# Supplementary material for: Improvement of Nanostructured Polythiophene Film Uniformity Using a Cruciform Electrode and Substrate Rotation in Atmospheric Pressure Plasma Polymerization
Source: MDPI journal article supplement (doi:10.3390/nano12010032), 2021-12-23
Supplement: s1 [file s1]

# Improvement of Nanostructured Polythiophene Film Uniformity Using a Cruciform Electrode and Substrate Rotation in Atmospheric Pressure Plasma Polymerization

Jae Young Kim <sup>1,†</sup>, Hyo Jun Jang <sup>1,†</sup>, Gyu Tae Bae <sup>1</sup>, Choon-Sang Park <sup>2</sup>, Eun Young Jung <sup>1,\*</sup>, and Heung-Sik Tae <sup>1,3,\*</sup>

<sup>1</sup> School of Electronic and Electrical Engineering, College of IT Engineering, Kyungpook National University, Daegu 41566, Korea; jyk@knu.ac.kr (J.Y.K.); bs00201@knu.ac.kr (H.J.J.); doctor047@knu.ac.kr (G.T.B.)

<sup>2</sup> Department of Electrical and Computer Engineering, College of Engineering, Kansas State University, Manhattan, KS 66506, USA; purplepcs@ksu.edu

<sup>3</sup> School of Electronics Engineering, College of IT Engineering, Kyungpook National University, Daegu 41566, Korea

\* Correspondence: eyjung@knu.ac.kr (E.Y.J.); hstae@ee.knu.ac.kr (H.-S.T.); Tel.: +82-53-950-6563 (H.-S.T.)

† These authors contributed equally to this work.

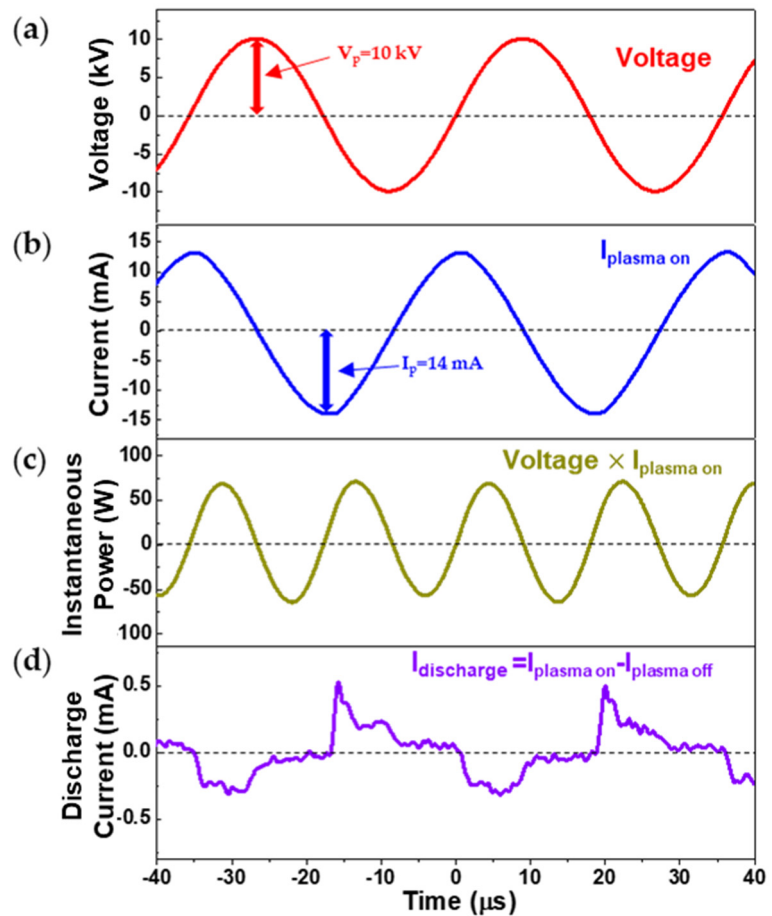

**Figure S1.** Applied waveforms of (a) voltage, (b) total current in plasma ON state, (c) instantaneous power, and (d) plasma discharge current under the conditions of Table 1.

The averaged power was calculated according to the following formula:

$$P = \frac{1}{T} \int_0^T U(t) \times I(t) dt$$

where T is the period of applied voltage, U(t) is the voltage signal, I(t) is the acquired current, and t is time, respectively. In Figure S1c, the integrated value of the waveform of the power during 1 period (from 0  $\mu$ s to 35.6  $\mu$ s) is  $1.565 \times 10^2$  W $\cdot\mu$ s. Therefore, the averaged power during 1 period is 4.40 W.

In Figure S1d, the plasma discharge current is measured as the difference between the total current when the plasma is sustaining ( $I_{\text{total}} = I_{\text{discharge}} + I_{\text{displacement}}$ ) and the total current when it is off ( $I_{\text{total}} = I_{\text{displacement}}$ ).
